# Supplementary material for: The long-term impact on self-reported health, function and comorbidities from lower limb apophysitis: Protocol of a cross-sectional study
Source: bioRxiv or medRxiv preprint supplement (doi:10.1101/2020.03.01.20029660), 2021-04-29
Supplement: Supplementary file [file media-1.pdf]

```
version 16.1
```

```
clear
```

```
use "data" //change to current file name of data
```

```
*****
```

```
* Preparation of continous variables *
```

```
*****
```

```
*Preparation of SF-12
```

```
//Installs the necessary ressources to use SF-12 codes in stata
```

```
ssc install sf12
```

```
//Stata SF-12 command
```

```
sf12 sf12_1 sf12_2 sf12_3 sf12_4 sf12_5 sf12_6 sf12_7 sf12_8 sf12_9 sf12_10 sf12_11 sf12_12
```

```
//This corrects all the categories to show the same score -> which means a higher score = better health.
```

```
list record_id pf rp bp gh vt sf re mh agg_phys agg_ment, noobs
```

```
//Shows all records/answers of all the corresponding scores - Output only works if all questions are answered.
```

```
//variables agg_phys & agg_ment show avg. values of PCS-12 & MCS-12.
```

```
*PREPARATION OF KOOS SCORE
```

```
//pain
```

```
gen KOOS_pain=100-(((p1+p2+p3+p4+p5+p6+p7+p8+p9)/9)/4)*100
```

```
label variable KOOS_pain "KOOS Pain 0-100"
```

```
//symptoms
```

```
gen KOOS_symp=100-(((s1+s2+s3+s4+s5+s6+s7)/7)/4)*100
```

```
label variable KOOS_symp "KOOS Symptoms 0-100"
```

```
//sport/rec
```

```
gen KOOS_sport=100-(((sp1+sp2+sp3+sp4+sp5)/5)/4)*100
```

```
label variable KOOS_sport "KOOS sport/req 0-100"
```

```
//QOL
```

```
gen KOOS_qol=100-(((q1+q2+q3+q4)/4)/4)*100
```

```
label variable KOOS_qol "KOOS QOL 0-100"
```

```
*****
```

```
* Preparation of SUBGROUPS *
```

```
*****
```

```
// 6 a-priori subgroups
```

```
* (1) Participants reporting short (6 months) vs. long (>6 months) apophysitis symptom duration.
```

```
gen apo_duration_shortlong=.
```

```
//short duration symptom
```

```
replace apo_duration_shortlong=0 if apo_duration<=3
```

```
//long duration symptom
```

```
replace apo_duration_shortlong=1 if apo_duration>=4 & apo_duration<8
```

```
// Note: the answers "ved ikke/kan ikke huske" + missing values are all excluded from the subgroup.
```

```
label variable apo_duration_shortlong "Apophysitis symptoms ranged by duration"
```

```
label define apo_duration_shortlong 0 "Short (<6 months)" 1 "Long (>6 months)"
```

```
label values apo_duration_shortlong apo_duration_shortlong
```

```
tab apo_duration_shortlong
```

```
* (2) Participants reporting significant limitation to sport and physical activity during their apophysitis vs. those that were not significantly affected.
```

```
gen apo_limit_sport=.
//Participants that were not significantly affected.
replace apo_limit_sport=0 if apo_limits<=3
//Participants reporting significant limitation to sport and physical activity
replace apo_limit_sport=1 if apo_limits>=4 & apo_limits<6
// Note: the answers "ved ikke/kan ikke huske" + missing values are all excluded from the subgroup.
```

```
label variable apo_limit_sport "Limitations to sport during their apophysitis"
label define apo_limit_sport 0 "Minimal or no limitation" 1 "Very or total limitation"
label values apo_limit_sport apo_limit_sport
tab apo_limit_sport
```

\* (3) Participants who currently have knee pain or symptoms from the same general area vs. those who currently do not.

```
gen kneepain_current=.
//Participants who currently do not
replace kneepain_current=0 if kneepain_was_week==0
//Participants who currently have knee pain
replace kneepain_current=1 if kneepain_was_week>=1 & kneepain_was_week<=100
// Note: Missing values are all excluded from the subgroup.
```

```
label variable kneepain_current "Current knee pain symptoms"
label define kneepain_current 0 "No pain" 1 "Pain"
label values kneepain_current kneepain_current
tab kneepain_current
```

\* (4) Participants who report having met WHO recommendations for physical activity in their adult life vs. does that report having been less physically active

```
gen pa_adult_rec=.
```

```
//Participants that report having been less physically active
replace pa_adult_rec=0 if pa_in_adulthood>=3 & pa_in_adulthood<=5
//Participants who report having met WHO recommendations for physical activity
replace pa_adult_rec=1 if pa_in_adulthood<=2
// Note: Missing values are all excluded from the subgroup.
```

```
label variable pa_adult_rec "WHO recommendations for physical activity"
label define pa_adult_rec 0 "Does not follow" 1 "Follows"
label values pa_adult_rec pa_adult_rec
tab pa_adult_rec
```

\* (5) Participants that report currently having a large bony prominence thought to originate from their apophysitis (only Osgood Schlatter patients) vs. those that does not

```
gen large_bony=.
//participants that report currently having a large bony prominence thought to originate from their
apophysitis (only Osgood Schlatter patients)
replace large_bony=1 if bony_derform==3 | bony_derform==4
//participants that do not
replace large_bony=0 if bony_derform==1 | bony_derform==2
// Note: the answers "ved ikke/kan ikke huske" + missing values are all excluded from the subgroup.
```

```
label variable large_bony "Bony prominence (Osgood Schlatter)"
label define large_bony 0 "No bony prominence" 1 "Small or large bony prominence"
label values large_bony large_bony
tab large_bony
```

\* (6) Participants that report severe symptoms during their apophysitis vs. those who only report having experienced light or moderate symptoms (based on pain intensity and restriction in physical activity and sport). RET ONDT I SEVERE GRUPPE

```
gen apo_severity=.
//participants with light/moderate symptoms during their apophysitis
```

```
replace apo_severity=0 if apo_limits==1 & pain_during_apo>=3 & pain_during_apo<5 | apo_limits==2 &
pain_during_apo<=4 | apo_limits==3 & pain_during_apo<=4 | apo_limits==4 & pain_during_apo<=4 &
pain_during_apo>2 | apo_limits==5 & pain_during_apo<=4 & pain_during_apo>2
```

```
//participants with severe symptoms during their apophysitis
```

```
replace apo_severity=1 if apo_limits==4 & pain_during_apo<=2 | apo_limits==5 & pain_during_apo<=2
```

```
// Note: the answers "ved ikke/kan ikke huske" + missing values are all excluded from the subgroup.
```

```
label variable apo_severity "Symptom severity during their apophysitis"
```

```
label define apo_severity 0 "Light or moderate symptoms" 1 "Severe symptoms"
```

```
label values apo_severity apo_severity
```

```
tab apo_severity
```

```
*****
```

```
* Test for normality continous variables *
```

```
*****
```

```
*Demographic variables
```

```
//age total
```

```
hist age
```

```
qnorm age
```

```
//age in apophysitis diagnosis groups
```

```
hist age if apo_diagnose==1
```

```
hist age if apo_diagnose==2
```

```
hist age if apo_diagnose==3
```

```
hist age if apo_diagnose==4
```

```
qnorm age if apo_diagnose==1
```

```
qnorm age if apo_diagnose==2
```

```
qnorm age if apo_diagnose==3
```

```
qnorm age if apo_diagnose==4
```

//height total

hist height

qnorm height

//height in apophysitis diagnosis groups

hist height if apo\_diagnose==1

hist height if apo\_diagnose==2

hist height if apo\_diagnose==3

hist height if apo\_diagnose==4

qnorm height if apo\_diagnose==1

qnorm height if apo\_diagnose==2

qnorm height if apo\_diagnose==3

qnorm height if apo\_diagnose==4

//weight total

hist weight

qnorm weight

//weight in apophysitis diagnosis groups

hist weight if apo\_diagnose==1

hist weight if apo\_diagnose==2

hist weight if apo\_diagnose==3

hist weight if apo\_diagnose==4

qnorm weight if apo\_diagnose==1

qnorm weight if apo\_diagnose==2

qnorm weight if apo\_diagnose==3

qnorm weight if apo\_diagnose==4

\*Outcome variables

\* SF-12

//PCS-12 total

hist agg\_phys

qnorm agg\_phys

//PCS-12 in apophysitis diagnosis groups

hist agg\_phys if apo\_diagnose==1

hist agg\_phys if apo\_diagnose==2

hist agg\_phys if apo\_diagnose==3

hist agg\_phys if apo\_diagnose==4

qnorm agg\_phys if apo\_diagnose==1

qnorm agg\_phys if apo\_diagnose==2

qnorm agg\_phys if apo\_diagnose==3

qnorm agg\_phys if apo\_diagnose==4

\*KOOS

//KOOS-pain total

hist KOOS\_pain

qnorm KOOS\_pain

//KOOS-pain in apophysitis diagnosis groups

hist KOOS\_pain if apo\_diagnose==1

hist KOOS\_pain if apo\_diagnose==2

hist KOOS\_pain if apo\_diagnose==3

hist KOOS\_pain if apo\_diagnose==4

qnorm KOOS\_pain if apo\_diagnose==1

qnorm KOOS\_pain if apo\_diagnose==2

qnorm KOOS\_pain if apo\_diagnose==3

qnorm KOOS\_pain if apo\_diagnose==4

//KOOS-symptoms total

```
hist KOOS_symp
qnorm KOOS_symp
```

```
//KOOS-symptoms in apophysitis diagnosis groups
```

```
hist KOOS_symp if apo_diagnose==1
hist KOOS_symp if apo_diagnose==2
hist KOOS_symp if apo_diagnose==3
hist KOOS_symp if apo_diagnose==4
qnorm KOOS_symp if apo_diagnose==1
qnorm KOOS_symp if apo_diagnose==2
qnorm KOOS_symp if apo_diagnose==3
qnorm KOOS_symp if apo_diagnose==4
```

```
//KOOS-sport/rec total
```

```
hist KOOS_sport
qnorm KOOS_sport
```

```
//KOOS-sport/rec in apophysitis diagnosis groups
```

```
hist KOOS_sport if apo_diagnose==1
hist KOOS_sport if apo_diagnose==2
hist KOOS_sport if apo_diagnose==3
hist KOOS_sport if apo_diagnose==4
qnorm KOOS_sport if apo_diagnose==1
qnorm KOOS_sport if apo_diagnose==2
qnorm KOOS_sport if apo_diagnose==3
qnorm KOOS_sport if apo_diagnose==4
```

```
*****
```

```
* Presentation of demographic variables *
```

```
*****
```



\* Total study population - table 1.

sum age

ci means age

tab gender

sum height

ci means height

sum weight

ci means weight

tab pa\_in\_adulthood //Only report inactive people.

sum agg\_phys

ci means agg\_phys

sum KOOS\_symp

ci means KOOS\_symp

sum KOOS\_pain

ci means KOOS\_pain

sum KOOS\_sport

ci means KOOS\_sport

//Musculoskeletal conditons

tab diseases\_knee\_heel\_related\_\_\_1

tab diseases\_knee\_heel\_related\_\_\_2

tab diseases\_knee\_heel\_related\_\_\_3

tab diseases\_knee\_heel\_related\_\_\_4

tab diseases\_knee\_heel\_related\_\_\_5

tab diseases\_knee\_heel\_related\_\_\_6

tab diseases\_knee\_heel\_related\_\_\_7

tab diseases\_knee\_heel\_related\_\_\_8

tab diseases\_knee\_heel\_related\_\_\_9

tab diseases\_knee\_heel\_r\_v\_1

tab diseases\_knee\_heel\_r\_v\_2

tab diseases\_knee\_heel\_r\_v\_3

// If normality is not met - detail command for median and interquartile range

sum age, detail

tab gender

sum height, detail

sum weight, detail

tab pa\_in\_adulthood //Only report inactive people.

sum agg\_phys, detail

sum KOOS\_symp, detail

sum KOOS\_pain, detail

sum KOOS\_sport,, detail

\* Studypopulation based on apophysitis

sum age if apo\_diagnose==1

sum age if apo\_diagnose==2

sum age if apo\_diagnose==3

sum age if apo\_diagnose==4

ci means age if apo\_diagnose==1

ci means age if apo\_diagnose==2

ci means age if apo\_diagnose==3

ci means age if apo\_diagnose==4

tab2 gender apo\_diagnose, column

sum height if apo\_diagnose==1

sum height if apo\_diagnose==2

sum height if apo\_diagnose==3

sum height if apo\_diagnose==4

ci means height if apo\_diagnose==1

ci means height if apo\_diagnose==2

ci means height if apo\_diagnose==3

ci means height if apo\_diagnose==4

sum weight if apo\_diagnose==1  
sum weight if apo\_diagnose==2  
sum weight if apo\_diagnose==3  
sum weight if apo\_diagnose==4  
ci means weight if apo\_diagnose==1  
ci means weight if apo\_diagnose==2  
ci means weight if apo\_diagnose==3  
ci means weight if apo\_diagnose==4  
tab2 pa\_in\_adulthood apo\_diagnose, column //Only report inactive people.  
sum agg\_phys if apo\_diagnose==1  
sum agg\_phys if apo\_diagnose==2  
sum agg\_phys if apo\_diagnose==3  
sum agg\_phys if apo\_diagnose==4  
ci means agg\_phys if apo\_diagnose==1  
ci means agg\_phys if apo\_diagnose==2  
ci means agg\_phys if apo\_diagnose==3  
ci means agg\_phys if apo\_diagnose==4  
sum KOOS\_symp if apo\_diagnose==1  
sum KOOS\_symp if apo\_diagnose==2  
sum KOOS\_symp if apo\_diagnose==3  
sum KOOS\_symp if apo\_diagnose==4  
ci means KOOS\_symp if apo\_diagnose==1  
ci means KOOS\_symp if apo\_diagnose==2  
ci means KOOS\_symp if apo\_diagnose==3  
ci means KOOS\_symp if apo\_diagnose==4  
sum KOOS\_pain if apo\_diagnose==1  
sum KOOS\_pain if apo\_diagnose==2  
sum KOOS\_pain if apo\_diagnose==3  
sum KOOS\_pain if apo\_diagnose==4  
ci means KOOS\_pain if apo\_diagnose==1

ci means KOOS\_pain if apo\_diagnose==2

ci means KOOS\_pain if apo\_diagnose==3

ci means KOOS\_pain if apo\_diagnose==4

sum KOOS\_sport if apo\_diagnose==1

sum KOOS\_sport if apo\_diagnose==2

sum KOOS\_sport if apo\_diagnose==3

sum KOOS\_sport if apo\_diagnose==4

ci means KOOS\_sport if apo\_diagnose==1

ci means KOOS\_sport if apo\_diagnose==2

ci means KOOS\_sport if apo\_diagnose==3

ci means KOOS\_sport if apo\_diagnose==4

//Musculoskeletal conditions

tab2 diseases\_knee\_heel\_related\_\_\_1 apo\_diagnose, column

tab2 diseases\_knee\_heel\_related\_\_\_2 apo\_diagnose, column

tab2 diseases\_knee\_heel\_related\_\_\_3 apo\_diagnose, column

tab2 diseases\_knee\_heel\_related\_\_\_4 apo\_diagnose, column

tab2 diseases\_knee\_heel\_related\_\_\_5 apo\_diagnose, column

tab2 diseases\_knee\_heel\_related\_\_\_6 apo\_diagnose, column

tab2 diseases\_knee\_heel\_related\_\_\_7 apo\_diagnose, column

tab2 diseases\_knee\_heel\_related\_\_\_8 apo\_diagnose, column

tab2 diseases\_knee\_heel\_related\_\_\_9 apo\_diagnose, column

tab2 diseases\_knee\_heel\_r\_v\_1 apo\_diagnose, column

tab2 diseases\_knee\_heel\_r\_v\_2 apo\_diagnose, column

tab2 diseases\_knee\_heel\_r\_v\_3 apo\_diagnose, column

\*\*\*\*\*

\* Statistical tests of continous variables \*

\*\*\*\*\*

\* SF-12 statistics

//PCS-12 in subgroups 1-6 with t-test and model checking + effect size estimation

```
//1
regress agg_phys apo_duration_shortlong
predict sdres, rstandard
predict fit
qnorm sdres
ttest agg_phys, by(apo_duration_shortlong)

esize twosample agg_phys , by(apo_duration_shortlong)
```

```
//2
regress agg_phys apo_limit_sport
predict sdres, rstandard
predict fit
qnorm sdres
ttest agg_phys, by(apo_limit_sport)

esize twosample agg_phys, by(apo_limit_sport)
```

```
//3
regress agg_phys kneepain_current
predict sdres, rstandard
predict fit
qnorm sdres
ttest agg_phys, by(kneepain_current)

esize twosample agg_phys, by(kneepain_current)
```

```
//4
regress agg_phys pa_adult_rec
predict sdres, rstandard
```

```
predict fit
qnorm sdres
ttest agg_phys, by(pa_adult_rec)

esize twosample agg_phys, by(pa_adult_rec)
```

```
//5
regress agg_phys large_bony
predict sdres, rstandard
predict fit
qnorm sdres
ttest agg_phys, by(large_bony)
```

```
esize twosample agg_phys, by(large_bony)
```

```
//6
regress agg_phys apo_severity
predict sdres, rstandard
predict fit
qnorm sdres
ttest agg_phys, by(apo_severity)
```

```
esize twosample agg_phys, by(apo_severity)
```

\*Apophysitis diagnose - oneway ANOVA, assumptions (outlier, normal distribution and Levene's test) and post-hoc test(tukeys).

```
// SF-12 PCS-12
tw sc agg_phys apo_diagnose
swilk agg_phys if apo_diagnose==1
swilk agg_phys if apo_diagnose==2
```

```
swilk agg_phys if apo_diagnose==3
swilk agg_phys if apo_diagnose==4
robvar agg_phys, by(apo_diagnose)
```

```
oneway agg_phys apo_diagnose, tabulate
pwmean agg_phys, over(apo_diagnose) mcompare(tukey) effects
```

```
* KOOS statistics
```

```
//KOOS-symp in subgroups 1-6 t-test, model checking and effect size
```

```
//1
```

```
regress KOOS_symp apo_duration_shortlong
```

```
predict sdres, rstandard
```

```
predict fit
```

```
qnorm sdres
```

```
ttest KOOS_symp, by(apo_duration_shortlong)
```

```
esize twosample KOOS_symp, by(apo_duration_shortlong)
```

```
//2
```

```
regress KOOS_symp apo_limit_sport
```

```
predict sdres, rstandard
```

```
predict fit
```

```
qnorm sdres
```

```
ttest KOOS_symp, by(apo_limit_sport)
```

```
esize twosample KOOS_symp, by(apo_limit_sport)
```

```
//3
```

```
regress KOOS_symp kneepain_current
```

```
predict sdres, rstandard
```

```
predict fit
qnorm sdres
ttest KOOS_symp, by(kneepain_current)

esize twosample KOOS_symp, by(kneepain_current)
```

```
//4
regress KOOS_symp pa_adult_rec
predict sdres, rstandard
predict fit
qnorm sdres
ttest KOOS_symp, by(pa_adult_rec)
```

```
esize twosample KOOS_symp, by(pa_adult_rec)
```

```
//5
regress KOOS_symp large_bony
predict sdres, rstandard
predict fit
qnorm sdres
ttest KOOS_symp, by(large_bony)
```

```
esize twosample KOOS_symp, by(large_bony)
```

```
//6
regress KOOS_symp apo_severity
predict sdres, rstandard
predict fit
qnorm sdres
ttest KOOS_symp, by(apo_severity)
```



```
esize twosample KOOS_symp, by(apo_severity)
```

\*Apophysitis diagnose - oneway ANOVA, assumptions (outlier, normal distribution and Levene's test) and post-hoc test(tukeys).

```
//KOOS symptoms
```

```
tw sc KOOS_symp apo_diagnose
```

```
swilk KOOS_symp if apo_diagnose==1
```

```
swilk KOOS_symp if apo_diagnose==2
```

```
swilk KOOS_symp if apo_diagnose==3
```

```
swilk KOOS_symp if apo_diagnose==4
```

```
robvar KOOS_symp, by(apo_diagnose)
```

```
oneway KOOS_symp apo_diagnose, tabulate
```

```
pwmean KOOS_symp, over(apo_diagnose) mcompare(tukey) effects
```

```
//KOOS-pain in subgroups 1-6 t-test, model checking and effect size
```

```
//1
```

```
regress KOOS_pain apo_duration_shortlong
```

```
predict sdres, rstandard
```

```
predict fit
```

```
qnorm sdres
```

```
ttest KOOS_pain, by(apo_duration_shortlong)
```

```
esize twosample KOOS_pain, by(apo_duration_shortlong)
```

```
//2
```

```
regress KOOS_pain apo_limit_sport
```

```
predict sdres, rstandard
```

```
predict fit
```

qnorm sdres

ttest KOOS\_pain, by(apo\_limit\_sport)

esize twosample KOOS\_pain, by(apo\_limit\_sport)

//3

regress KOOS\_pain kneepain\_current

predict sdres, rstandard

predict fit

qnorm sdres

ttest KOOS\_pain, by(kneepain\_current)

esize twosample KOOS\_pain, by(kneepain\_current)

//4

regress KOOS\_pain pa\_adult\_rec

predict sdres, rstandard

predict fit

qnorm sdres

ttest KOOS\_pain, by(pa\_adult\_rec)

esize twosample KOOS\_pain, by(pa\_adult\_rec)

//5

regress KOOS\_pain large\_bony

predict sdres, rstandard

predict fit

qnorm sdres

ttest KOOS\_pain, by(large\_bony)

```
esize twosample KOOS_pain, by(large_bony)
```

```
//6
```

```
regress KOOS_pain apo_severity
```

```
predict sdres, rstandard
```

```
predict fit
```

```
qnorm sdres
```

```
ttest KOOS_pain, by(apo_severity)
```

```
esize twosample KOOS_pain, by(apo_severity)
```

\*Apophysitis diagnose - oneway ANOVA, assumptions (outlier, normal distribution and Levene's test) and post-hoc test(tukeys).

```
//KOOS pain
```

```
tw sc KOOS_pain apo_diagnose
```

```
swilk KOOS_pain if apo_diagnose==1
```

```
swilk KOOS_pain if apo_diagnose==2
```

```
swilk KOOS_pain if apo_diagnose==3
```

```
swilk KOOS_pain if apo_diagnose==4
```

```
robvar KOOS_pain, by(apo_diagnose)
```

```
oneway KOOS_pain apo_diagnose, tabulate
```

```
pwmean KOOS_pain, over(apo_diagnose) mcompare(tukey) effects
```

```
//KOOS-sport/rec in subgroups 1-6 t-test, model checking and effect size
```

```
//1
```

```
regress KOOS_sport apo_duration_shortlong
```

```
predict sdres, rstandard
```

```
predict fit
```

```
qnorm sdres
```

```
ttest KOOS_sport, by(apo_duration_shortlong)
```

```
esize twosample KOOS_sport, by(apo_duration_shortlong)
```

```
//2
```

```
regress KOOS_sport apo_limit_sport
```

```
predict sdres, rstandard
```

```
predict fit
```

```
qnorm sdres
```

```
ttest KOOS_sport, by(apo_limit_sport)
```

```
esize twosample KOOS_sport, by(apo_limit_sport)
```

```
//3
```

```
regress KOOS_sport kneepain_current
```

```
predict sdres, rstandard
```

```
predict fit
```

```
qnorm sdres
```

```
ttest KOOS_sport, by(kneepain_current)
```

```
esize twosample KOOS_sport, by(kneepain_current)
```

```
//4
```

```
regress KOOS_sport pa_adult_rec
```

```
predict sdres, rstandard
```

```
predict fit
```

```
qnorm sdres
```

```
ttest KOOS_sport, by(pa_adult_rec)
```

```
esize twosample KOOS_sport, by(pa_adult_rec)
```

```
//5
regress KOOS_sport large_bony
predict sdres, rstandard
predict fit
qnorm sdres
ttest KOOS_sport, by(large_bony)

esize twosample KOOS_sport, by(large_bony)
```

```
//6
regress KOOS_sport apo_severity
predict sdres, rstandard
predict fit
qnorm sdres
ttest KOOS_sport, by(apo_severity)

esize twosample KOOS_sport, by(apo_severity)
```

\*Apophysitis diagnose - oneway ANOVA, assumptions (outlier, normal distribution and Levene's test) and post-hoc test(tukeys).

```
//KOOS sport-req
tw sc KOOS_sport apo_diagnose
swilk KOOS_sport if apo_diagnose==1
swilk KOOS_sport if apo_diagnose==2
swilk KOOS_sport if apo_diagnose==3
swilk KOOS_sport if apo_diagnose==4
robvar KOOS_sport, by(apo_diagnose)

oneway KOOS_sport apo_diagnose, tabulate
```

pwmean KOOS\_sport, over(apo\_diagnose) mcompare(tukey) effects

\*\*\*\*\*

\* Statistical associations of disease variables in subgroups and apophysitis \*

\*\*\*\*\*

\* Logistic regression OR of 12 knee-heel related conditions in subgroups

//Subgroup (1)

logistic diseases\_knee\_heel\_related\_\_\_1 apo\_duration\_shortlong, baselevels

logistic diseases\_knee\_heel\_related\_\_\_2 apo\_duration\_shortlong, baselevels

logistic diseases\_knee\_heel\_related\_\_\_3 apo\_duration\_shortlong, baselevels

logistic diseases\_knee\_heel\_related\_\_\_4 apo\_duration\_shortlong, baselevels

logistic diseases\_knee\_heel\_related\_\_\_5 apo\_duration\_shortlong, baselevels

logistic diseases\_knee\_heel\_related\_\_\_6 apo\_duration\_shortlong, baselevels

logistic diseases\_knee\_heel\_related\_\_\_7 apo\_duration\_shortlong, baselevels

logistic diseases\_knee\_heel\_related\_\_\_8 apo\_duration\_shortlong, baselevels

logistic diseases\_knee\_heel\_related\_\_\_9 apo\_duration\_shortlong, baselevels

logistic diseases\_knee\_heel\_r\_v\_1 apo\_duration\_shortlong, baselevels

logistic diseases\_knee\_heel\_r\_v\_2 apo\_duration\_shortlong, baselevels

logistic diseases\_knee\_heel\_r\_v\_3 apo\_duration\_shortlong, baselevels

//Subgroup (2)

logistic diseases\_knee\_heel\_related\_\_\_1 apo\_limit\_sport, baselevels

logistic diseases\_knee\_heel\_related\_\_\_2 apo\_limit\_sport, baselevels

logistic diseases\_knee\_heel\_related\_\_\_3 apo\_limit\_sport, baselevels

logistic diseases\_knee\_heel\_related\_\_\_4 apo\_limit\_sport, baselevels

logistic diseases\_knee\_heel\_related\_\_\_5 apo\_limit\_sport, baselevels

logistic diseases\_knee\_heel\_related\_\_\_6 apo\_limit\_sport, baselevels

logistic diseases\_knee\_heel\_related\_\_\_7 apo\_limit\_sport, baselevels

logistic diseases\_knee\_heel\_related\_\_\_8 apo\_limit\_sport, baselevels

logistic diseases\_knee\_heel\_related\_\_\_9 apo\_limit\_sport, baselevels

logistic diseases\_knee\_heel\_r\_v\_1 apo\_limit\_sport, baselevels  
logistic diseases\_knee\_heel\_r\_v\_2 apo\_limit\_sport, baselevels  
logistic diseases\_knee\_heel\_r\_v\_3 apo\_limit\_sport, baselevels

//Subgroup (3)

logistic diseases\_knee\_heel\_related\_\_\_1 kneepain\_current, baselevels  
logistic diseases\_knee\_heel\_related\_\_\_2 kneepain\_current, baselevels  
logistic diseases\_knee\_heel\_related\_\_\_3 kneepain\_current, baselevels  
logistic diseases\_knee\_heel\_related\_\_\_4 kneepain\_current, baselevels  
logistic diseases\_knee\_heel\_related\_\_\_5 kneepain\_current, baselevels  
logistic diseases\_knee\_heel\_related\_\_\_6 kneepain\_current, baselevels  
logistic diseases\_knee\_heel\_related\_\_\_7 kneepain\_current, baselevels  
logistic diseases\_knee\_heel\_related\_\_\_8 kneepain\_current, baselevels  
logistic diseases\_knee\_heel\_related\_\_\_9 kneepain\_current, baselevels  
logistic diseases\_knee\_heel\_r\_v\_1 kneepain\_current, baselevels  
logistic diseases\_knee\_heel\_r\_v\_2 kneepain\_current, baselevels  
logistic diseases\_knee\_heel\_r\_v\_3 kneepain\_current, baselevels

//Subgroup (4)

logistic diseases\_knee\_heel\_related\_\_\_1 pa\_adult\_rec, baselevels  
logistic diseases\_knee\_heel\_related\_\_\_2 pa\_adult\_rec, baselevels  
logistic diseases\_knee\_heel\_related\_\_\_3 pa\_adult\_rec, baselevels  
logistic diseases\_knee\_heel\_related\_\_\_4 pa\_adult\_rec, baselevels  
logistic diseases\_knee\_heel\_related\_\_\_5 pa\_adult\_rec, baselevels  
logistic diseases\_knee\_heel\_related\_\_\_6 pa\_adult\_rec, baselevels  
logistic diseases\_knee\_heel\_related\_\_\_7 pa\_adult\_rec, baselevels  
logistic diseases\_knee\_heel\_related\_\_\_8 pa\_adult\_rec, baselevels  
logistic diseases\_knee\_heel\_related\_\_\_9 pa\_adult\_rec, baselevels  
logistic diseases\_knee\_heel\_r\_v\_1 pa\_adult\_rec, baselevels  
logistic diseases\_knee\_heel\_r\_v\_2 pa\_adult\_rec, baselevels

logistic diseases\_knee\_heel\_r\_v\_3 pa\_adult\_rec, baselevels

//Subgroup (5)

logistic diseases\_knee\_heel\_related\_\_\_1 large\_bony, baselevels

logistic diseases\_knee\_heel\_related\_\_\_2 large\_bony, baselevels

logistic diseases\_knee\_heel\_related\_\_\_3 large\_bony, baselevels

logistic diseases\_knee\_heel\_related\_\_\_4 large\_bony, baselevels

logistic diseases\_knee\_heel\_related\_\_\_5 large\_bony, baselevels

logistic diseases\_knee\_heel\_related\_\_\_6 large\_bony, baselevels

logistic diseases\_knee\_heel\_related\_\_\_7 large\_bony, baselevels

logistic diseases\_knee\_heel\_related\_\_\_8 large\_bony, baselevels

logistic diseases\_knee\_heel\_related\_\_\_9 large\_bony, baselevels

logistic diseases\_knee\_heel\_r\_v\_1 large\_bony, baselevels

logistic diseases\_knee\_heel\_r\_v\_2 large\_bony, baselevels

logistic diseases\_knee\_heel\_r\_v\_3 large\_bony, baselevels

//Subgroup (6)

logistic diseases\_knee\_heel\_related\_\_\_1 apo\_severity apo\_severity , baselevels

logistic diseases\_knee\_heel\_related\_\_\_2 apo\_severity apo\_severity , baselevels

logistic diseases\_knee\_heel\_related\_\_\_3 apo\_severity apo\_severity , baselevels

logistic diseases\_knee\_heel\_related\_\_\_4 apo\_severity apo\_severity , baselevels

logistic diseases\_knee\_heel\_related\_\_\_5 apo\_severity apo\_severity , baselevels

logistic diseases\_knee\_heel\_related\_\_\_6 apo\_severity apo\_severity , baselevels

logistic diseases\_knee\_heel\_related\_\_\_7 apo\_severity apo\_severity , baselevels

logistic diseases\_knee\_heel\_related\_\_\_8 apo\_severity apo\_severity , baselevels

logistic diseases\_knee\_heel\_related\_\_\_9 apo\_severity apo\_severity , baselevels

logistic diseases\_knee\_heel\_r\_v\_1 apo\_severity, baselevels

logistic diseases\_knee\_heel\_r\_v\_2 apo\_severity, baselevels

logistic diseases\_knee\_heel\_r\_v\_3 apo\_severity, baselevels



\* Logistic regression OR of 12 knee-heel related conditions in apophysitis diagnosis

logistic diseases\_knee\_heel\_related\_\_\_1 i.apo\_diagnose, baselevels

logistic diseases\_knee\_heel\_related\_\_\_2 i.apo\_diagnose, baselevels

logistic diseases\_knee\_heel\_related\_\_\_3 i.apo\_diagnose, baselevels

logistic diseases\_knee\_heel\_related\_\_\_4 i.apo\_diagnose, baselevels

logistic diseases\_knee\_heel\_related\_\_\_5 i.apo\_diagnose, baselevels

logistic diseases\_knee\_heel\_related\_\_\_6 i.apo\_diagnose, baselevels

logistic diseases\_knee\_heel\_related\_\_\_7 i.apo\_diagnose, baselevels

logistic diseases\_knee\_heel\_related\_\_\_8 i.apo\_diagnose, baselevels

logistic diseases\_knee\_heel\_related\_\_\_9 i.apo\_diagnose, baselevels

logistic diseases\_knee\_heel\_r\_v\_1 i.apo\_diagnose, baselevels

logistic diseases\_knee\_heel\_r\_v\_2 i.apo\_diagnose, baselevels

logistic diseases\_knee\_heel\_r\_v\_3 i.apo\_diagnose, baselevels
